# Supplementary material for: Unveiling the relationship between polymorphism and ionic conductivity in Na3−xSb1−xWxS4 solid electrolyte for Na-ion batteries
Source: Royal Society of Chemistry journal article supplement (doi:10.1039/d4ta04541f), 2024-01-01
Supplement: d4ta04541f1.pdf [file d4ta04541f1.pdf]

## SUPPORTING INFORMATION

### Unveiling the relationship between polymorphism and ionic conductivity in $\text{Na}_{3-x}\text{Sb}_{1-x}\text{W}_x\text{S}_4$ solid electrolyte for Na-ion batteries

Marco Ravalli<sup>a</sup>, Mehdi Soleimanzade<sup>b</sup>, Marco Scavini<sup>c</sup>, Serena Chiara Tarantino<sup>a</sup>, Mariano Radaelli<sup>b</sup>, Cristina Tealdi<sup>a,d\*</sup>

<sup>a</sup> Department of Chemistry, University of Pavia, Via Taramelli 12, 27100, Pavia, Italy.

<sup>b</sup> Ricerca Sul Sistema Energetico - RSE S.p.A., via Raffaele Rubattino 54, 20134 Milano, Italy.

<sup>c</sup> Department of Chemistry, University of Milano, Via Golgi 19, 20131 Milano, Italy.

<sup>d</sup> GISEL-INSTM, Firenze 50121, Italy.

\*email: cristina.tealdi@unipv.it

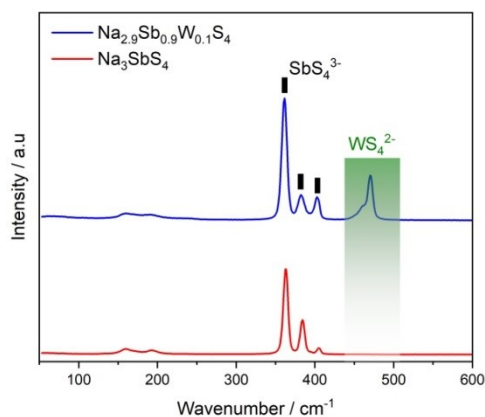

**Figure S1** - Raman spectra of the prepared  $\text{Na}_{3-x}\text{Sb}_{1-x}\text{W}_x\text{S}_4$  samples (nominal compositions  $x=0$  and  $x=0.1$ ).

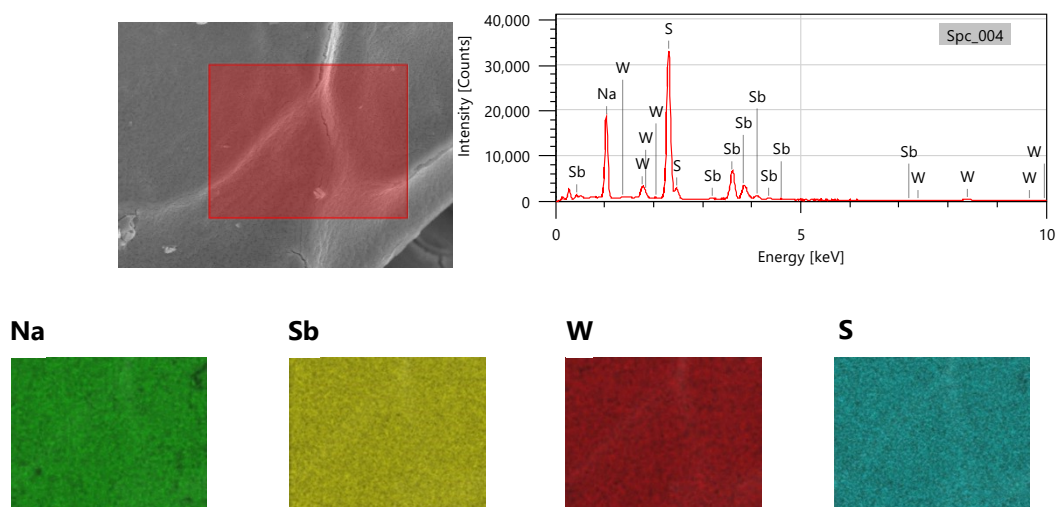

**Figure S2** Example of SEM image and elemental mapping for the sample of nominal composition  $\text{Na}_{2.9}\text{Sb}_{0.9}\text{W}_{0.1}\text{S}_4$ .

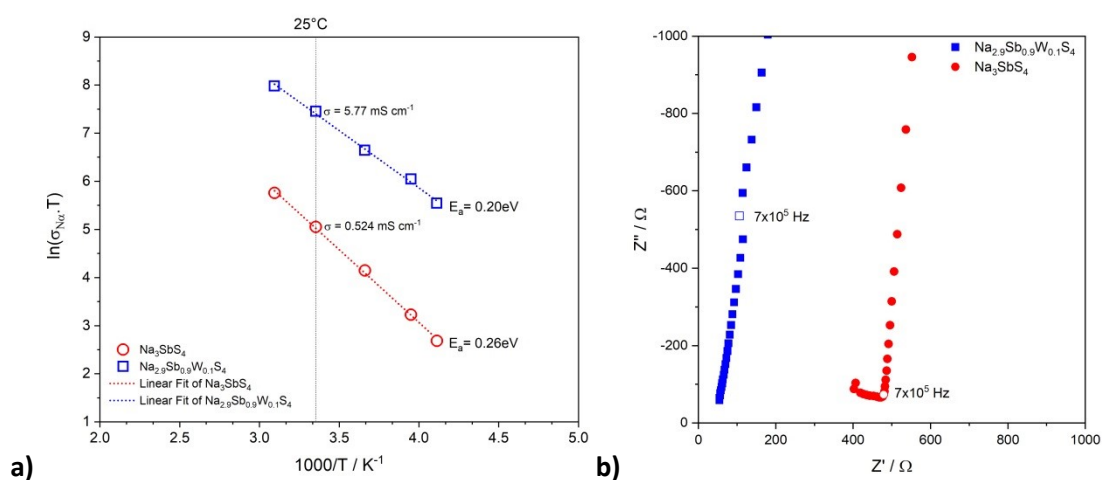

**Figure S3** – Arrhenius plots of conductivity (a) and examples of Nyquist plots (b) for the two sample of nominal compositions  $Na_3SbS_4$  and  $Na_{2.9}Sb_{0.9}W_{0.1}S_4$

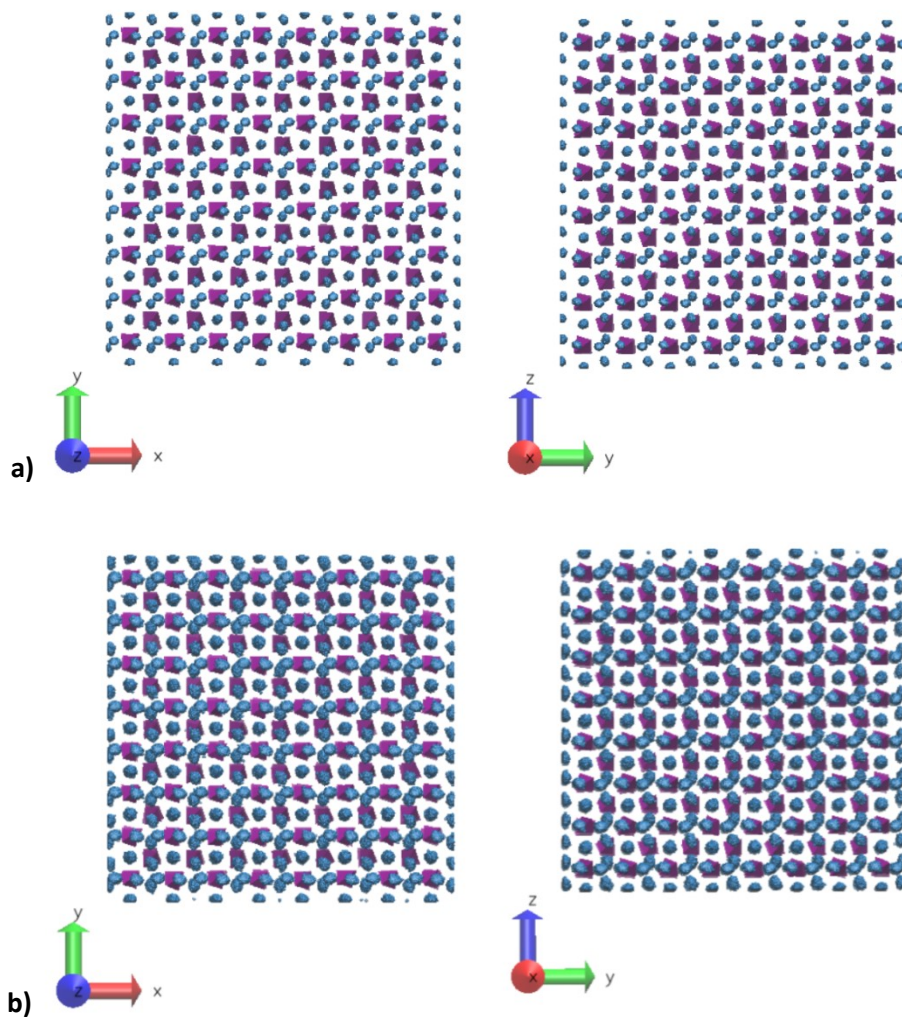

**Figure S4** - Trajectory plots of Na ion in  $Na_3SbS_4$ , as derived from MD simulations at 300K (a) and 700K (b). Purple polyhedra represent the coordination environment of Sb; blue dots represent the positions that the Na ions have occupied over the simulation time.

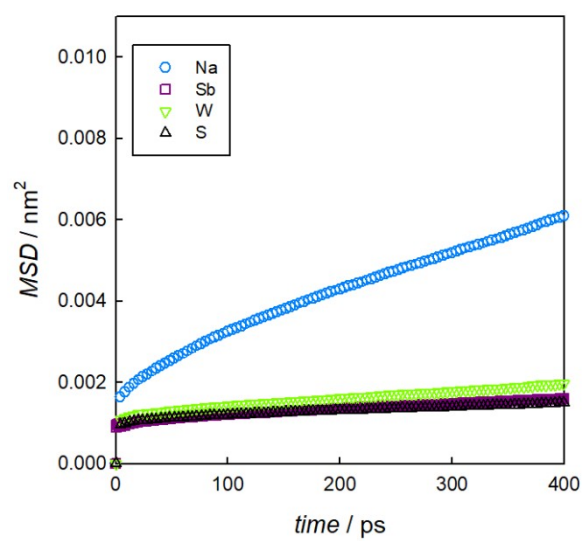

**Figure S5** – Comparison of the ion MSD over simulation time for all the atomic species for the sample SbW12.5.

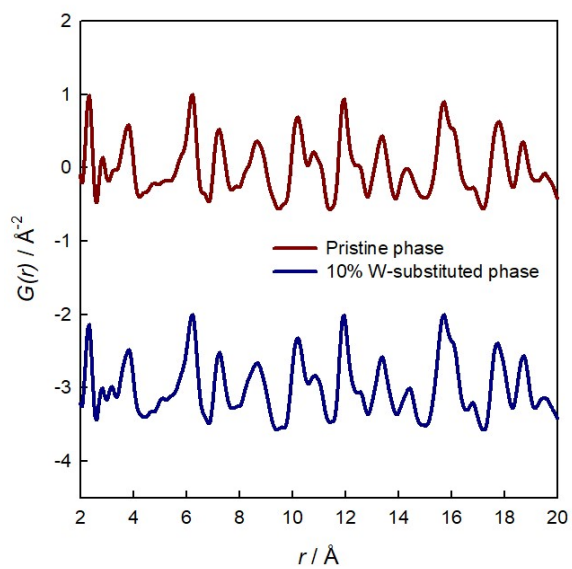

**Figure S6** – Comparison between the PDF data of Na<sub>3</sub>SbS<sub>4</sub> and Na<sub>2.9</sub>Sb<sub>0.9</sub>W<sub>0.10</sub>S<sub>4</sub>.

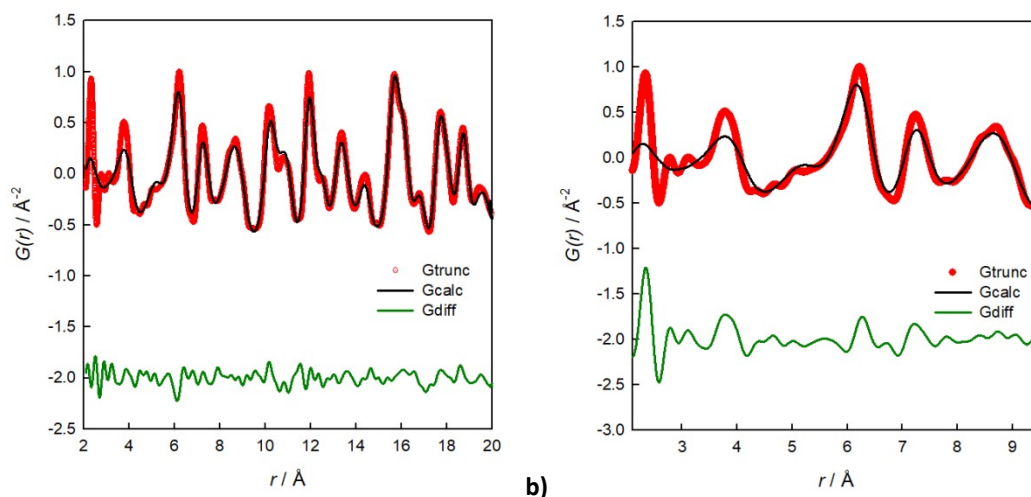

**Figure S7** – Example of the difference between the experimental and the calculated PDFs based on the cubic model refined in the medium 20-50 Å  $r$ -range applied to two different  $r$ -ranges without further refinement, showing the low agreement between the experimental and computational models and the necessity to further refine the model: a) 2-20 Å ( $R_{wp} = 38.14$ ); b) 2-9.50 Å ( $R_{wp} = 45.66$ )

**Table S1** Potential model parameters and partial charges used for the description of the  $\text{Na}_3\text{Sb}_1\text{S}_4$  (a) and  $\text{Na}_{2.875}\text{Sb}_{0.875}\text{W}_{0.125}\text{S}_4$  (b) compositions. The pair potentials are in the form of the Buckingham two-body potentials ( $U(r) = Ae^{-r/\rho} - Cr^{-6}$ ), where  $r$  is the interatomic distance.

| Interaction | A         | $\rho$ | C        |
|-------------|-----------|--------|----------|
| Na-S        | 1659.1800 | 0.3517 | 0.000    |
| Sb-S        | 257.9196  | 0.5506 | 0.000    |
| W-S         | 202.4500  | 0.5021 | 0.000    |
| S-S         | 9387.0500 | 0.3550 | 1229.531 |

a)

| atom | partial charge |
|------|----------------|
| Na   | 1.260550       |
| Sb   | 3.005060       |
| S    | -1.6966773     |

b)

| atom | partial charge |
|------|----------------|
| Na   | 1.260000       |
| Sb   | 3.000000       |
| W    | 2.540000       |
| S    | -1.64125       |

**Table S2** – Room temperature Rietveld refined crystallographic parameters and agreement factors as derived from synchrotron data for a)  $\text{Na}_3\text{SbS}_4$  and b)  $\text{Na}_{2.9}\text{Sb}_{0.9}\text{W}_{0.1}\text{S}_4$ .

**a)**  $\text{Na}_3\text{SbS}_4$  (Space group: P -4  $2_1$ c). Phase content: 96.65%;  $\text{NaSbS}_2$  (Space group: P -1) 3.35%.

R\_Bragg = 3.58; Rwp: 9.51

| $a = b$ (Å)  | $c$ (Å)       | $\alpha=\beta=\gamma$ (°) | $V$ (Å <sup>3</sup> ) |
|--------------|---------------|---------------------------|-----------------------|
| 7.169052 (8) | 7.294751 (11) | 90                        | 374.916 (1)           |

| Species | x            | y           | z            | Occupancy | $B_{\text{eq}}$ |
|---------|--------------|-------------|--------------|-----------|-----------------|
| Sb      | 0            | 0           | 0            | 1         | 0.92 (1)        |
| S       | -0.2037 (14) | 0.1716 (14) | -0.1824 (13) | 1         | 1.37 (2)        |
| Na1     | 0            | 1/2         | 0.4347 (28)  | 0.991 (4) | 3.46 (5)        |
| Na2     | 0            | 0           | 1/2          | 1         | 4.29 (6)        |

**b)**  $\text{Na}_{2.9}\text{Sb}_{0.9}\text{W}_{0.1}\text{S}_4$  (Space group: I -4 3m). Phase content: 99.8%;  $\text{WS}_2$  (Space group: P -1) 0.2%.

R\_Bragg = 4.29; Rwp: 9.44

| $a=b=c$ (Å)   | $\alpha=\beta=\gamma$ (°) | $V$ (Å <sup>3</sup> ) |
|---------------|---------------------------|-----------------------|
| 7.208060 (11) | 90                        | 374.503 (2)           |

| Species | x           | y           | z           | Occupancy | $B_{\text{eq}}$ |
|---------|-------------|-------------|-------------|-----------|-----------------|
| Sb      | 0           | 0           | 0           | 0.90 (1)  | 1.21 (2)        |
| W       | 0           | 0           | 0           | 0.10 (1)  | 1.21 (2)        |
| S       | 0.18551 (9) | 0.18551 (9) | 0.18551 (9) | 1         | 2.43 (3)        |
| Na1     | 0           | 0.0571 (6)  | 1/2         | 0.236 (1) | 2.59 (14)       |
